# Supplementary material for: Impella Versus Intra‐Aortic Balloon Pump in Patients With Cardiogenic Shock Treated With Venoarterial Extracorporeal Membrane Oxygenation: An Observational Study
Source: PubMed Central journal article supplement — J Am Heart Assoc. 2024 Jan 19;13(3):e032607. doi: 10.1161/JAHA.123.032607 (PMC11056174; doi:10.1161/jaha.123.032607), 2024-01-19

# **Supplemental Material**

**Table S1. ICD-10-CM and ICD-10-PCS Codes to Identify Diagnoses, Comorbidities, Procedures, and Outcomes.**

| <b>Diagnosis/ Procedure</b>                | <b>ICD-10 Codes</b>                                                                                                                                                           |
|--------------------------------------------|-------------------------------------------------------------------------------------------------------------------------------------------------------------------------------|
| Cardiogenic shock                          | R57.0                                                                                                                                                                         |
| Cardiogenic shock after cardiectomy        | T8111XA                                                                                                                                                                       |
| VA-ECMO                                    | 5A15223, 5A1522G, 5A1522F                                                                                                                                                     |
| Intra-aortic balloon pump                  | 5A02110, 5A02210                                                                                                                                                              |
| Impella                                    | 5A0221D                                                                                                                                                                       |
| Impella 5.0/LD/5.5                         | Concomitant MS-DRG codes of 1, 2                                                                                                                                              |
| ST-elevation myocardial infarction         | I21.01, I21.02, I21.09, I21.11, I21.19, I21.21, I21.29, I21.3                                                                                                                 |
| Non-ST-elevation myocardial infarction     | I21.4, I21.9                                                                                                                                                                  |
| Previous cardiac arrest                    | Z86.74                                                                                                                                                                        |
| Prior percutaneous coronary intervention   | Z98.61                                                                                                                                                                        |
| Prior coronary artery bypass graft surgery | Z95.1                                                                                                                                                                         |
| Chronic kidney disease                     | I12.0, I12.9, I13.0, I13.10, I13.11, I13.2, N04, N04.x, N07.x, N08, N18.x, N18.4,<br>N18.5, N18.6, N18.9, N19, R94.4, Z49.01, Z49.02, Z49.31, Z49.32, Z91.15, Z99.2,<br>Z94.0 |

|                                     |                                                                                                                                                                                                                                                                                                                                                                                                                                                                                                                                                                                                                                                                                                                                                                  |
|-------------------------------------|------------------------------------------------------------------------------------------------------------------------------------------------------------------------------------------------------------------------------------------------------------------------------------------------------------------------------------------------------------------------------------------------------------------------------------------------------------------------------------------------------------------------------------------------------------------------------------------------------------------------------------------------------------------------------------------------------------------------------------------------------------------|
| History of congestive heart failure | I11.0, I13.0, I13.2, I09.81, I50.1, I50.20, I50.22, I50.30, I50.32, I50.40, I50.42,<br>I50.810, I50.812, I50.814, I50.82, I50.83, I50.84, I50.89, I50.9                                                                                                                                                                                                                                                                                                                                                                                                                                                                                                                                                                                                          |
| Atrial fibrillation/flutter         | I48.0, I48.1x, I48.2x, I48.3, I48.4, I48.91, I48.92                                                                                                                                                                                                                                                                                                                                                                                                                                                                                                                                                                                                                                                                                                              |
| Coagulopathy                        | D66, D67, D68.0, D68.00, D68.01, D68.020, D68.021, D68.022, D68.023, D68.029,<br>D68.03, D68.1, D68.2, D68.312, D68.8,<br>D68.9, D69.1, D69.3, D69.41, D69.42, D69.49, D69.6, D69.8, D69.9                                                                                                                                                                                                                                                                                                                                                                                                                                                                                                                                                                       |
| Percutaneous coronary intervention  | 0210344, 02103D4, 0211344, 02113D4, 0212344, 02123D4, 0213344, 02133D4,<br>0270356, 027035Z, 0270366, 027036Z, 0270376, 027037Z, 02703E6, 02703EZ,<br>02703F6, 02703FZ, 02703G6, 02703GZ, 0271356, 027135Z, 0271366, 027136Z,<br>0271376, 027137Z, 02713E6, 02713EZ, 02713F6, 02713FZ, 02713G6, 02713GZ,<br>0272356, 027235Z, 0272366, 027236Z, 0272376, 027237Z, 02723E6, 02723EZ,<br>02723F6, 02723FZ, 02723G6, 02723GZ, 0273356, 027335Z, 0273366, 027336Z,<br>0273376, 027337Z, 02733E6, 02733EZ, 02733F6, 02733FZ, 02733G6, 02733GZ,<br>02C03Z6, 02C03Z7, 02C03ZZ, 02C13Z6, 02C13Z7, 02C13ZZ, 02C23Z6, 02C23Z7,<br>02C33Z6, 02C33Z7, 02F03ZZ, 02F13ZZ, 02F23ZZ, 02F33ZZ, 02H03DZ, 2H03YZ,<br>02H13DZ, 02H13YZ, 02H23DZ, 02H23YZ, 02H33DZ, 02H33YZ, 02N03ZZ, |

02N13ZZ, 02N23ZZ, 02N33ZZ, 02Q03ZZ, 02Q13ZZ, 02Q23ZZ, 02Q33ZZ,  
02U037Z, 02U038Z, 02U03JZ, 02U03KZ, 02U137Z, 02U138Z, 02U13JZ,  
02U13KZ, 02U237Z, 02U238Z, 02U23JZ, 02U23KZ, 02U337Z, 02U338Z,  
02U33JZ, 02U33KZ, X2C0361, X2C1361, X2C2361, X2C3361, 0370346, 037034Z,  
03703ZZ, 03Q13ZZ, 037134Z, 03713ZZ, 03C13ZZ, 027, 0270, 0270046, 027004Z,  
02700D6, 02700DZ, 02700T6, 02700TZ, 02700Z6, 02700ZZ, 0270346, 027034Z,  
02703D6, 02703DZ, 02703T6, 02703TZ, 02703Z6, 02703ZZ, 0270446, 027044Z,  
02704D6, 02704DZ, 02704T6, 02704TZ, 02704Z6, 02704ZZ, 0271, 0271046,  
027104Z, 02710D6, 02710DZ, 02710T6, 02710TZ, 02710Z6, 02710ZZ, 0271346,  
027134Z, 02713D6, 02713DZ, 02713T6, 02713TZ, 02713Z6, 02713ZZ, 0271446,  
027144Z, 02714D6, 02714DZ, 02714T6, 02714TZ, 02714Z6, 02714ZZ, 0272,  
0272046, 027204Z, 02720D6, 02720DZ, 02720T6, 02720TZ, 02720Z6, 02720ZZ,  
0272346, 027234Z, 02723D6, 02723DZ, 02723T6, 02723TZ, 02723Z6, 02723ZZ,  
0272446, 027244Z, 02724D6, 02724DZ, 02724T6, 02724TZ, 02724Z6, 02724ZZ,  
0273, 0273046, 027304Z, 02730D6, 02730DZ, 02730T6, 02730TZ, 02730Z6,  
02730ZZ, 0273346, 027334Z, 02733D6, 02733DZ, 02733T6, 02733TZ, 02733Z6,

02733ZZ, 0273446, 027344Z, 02734D6, 02734DZ, 02734T6, 02734TZ, 02734Z6,  
02734ZZ, 02C, 02C0, 02C03ZZ, 02C04ZZ, 02C13ZZ, 02C14ZZ, 02C23ZZ,  
02C24ZZ, 02C33ZZ, 02C34ZZ

Coronary artery bypass graft surgery

0210093, 02100A3, 02100J3, 02100K3, 02100Z3, 0210493, 02104A3, 02104J3,  
02104K3, 02104Z3, 021008W, 021009W, 02100AW, 02100JW, 02100KW,  
021049W, 02104AW, 02104JW, 02104KW, 021108W, 021109W, 02110AW,  
02110JW, 02110KW, 021149W, 02114AW, 02114JW, 02114KW, 021208W,  
021209W, 02120AW, 02120JW, 02120KW, 021249W, 02124AW, 02124JW,  
02124KW, 021308W, 021309W, 02130AW, 02130JW, 02130KW, 021349W,  
02134AW, 02134JW, 02134KW, 0210088, 0210098, 0210099, 021009C, 02100A8,  
02100A9, 02100AC, 02100J8, 02100J9, 02100JC, 02100K8, 02100K9, 02100KC,  
02100Z8, 02100Z9, 02100ZC, 0210498, 0210499, 021049C, 02104A8, 02104A9,  
02104AC, 02104J8, 02104J9, 02104JC, 02104K8, 02104K9, 02104KC, 02104Z8,  
02104Z9, 02104ZC, 0211088, 0211089, 021108C, 0211098, 0211099, 021109C,  
02110A8, 02110A9, 02110AC, 02110J8, 02110J9, 02110JC, 02110K8, 02110K9,  
02110KC, 02110Z8, 02110Z9, 02110ZC, 0211498, 0211499, 021149C, 02114A8,

02114A9, 02114AC, 02114J8, 02114J9, 02114JC, 02114K8, 02114K9, 02114KC,  
02114Z8, 02114Z9, 02114ZC, 021209C, 02120AC, 02120JC, 02120KC, 02120ZC,  
021249C, 02124AC, 02124JC, 02124KC, 02124ZC, 021309C, 02130AC, 02130JC,  
02130KC, 02130ZC, 021349C, 02134AC, 02134JC, 02134KC, 02134ZC, 021008F,  
021009F, 02100AF, 02100JF, 02100KF, 02100ZF, 021049F, 02104AF, 02104JF,  
02104KF, 02104ZF, 0210083, 0210093, 02100A3, 02100J3, 02100K3, 02100Z3,  
0210493, 02104A3, 02104J3, 02104K3, 02104Z3, 0210089, 021008C, 0210444,  
0210483, 0210488, 0210489, 021048C, 021048F, 021048W, 02104D4, 0211083,  
021108F, 0211093, 0211098, 021109F, 02110A3, 02110J3, 02110JF, 02110JW,  
02110K3, 02110KF, 02110Z3, 02110ZF, 0211444, 0211483, 0211488, 0211489,  
021148C, 021148F, 021148W, 0211493, 021149F, 02114A3, 02114AF, 02114D4,  
02114J3, 02114JF, 02114KF, 02114Z3, 02114ZF, 0212083, 0212088, 0212089,  
021208C, 021208F, 0212093, 0212098, 0212099, 021209F, 02120A3, 02120A8,  
02120A9, 02120AC, 02120AF, 02120J3, 02120J8, 02120J9, 02120JF, 02120K3,  
02120K8, 02120K9, 02120KF, 02120Z3, 02120Z8, 02120Z9, 02120ZF, 0212444,  
0212483, 0212488, 0212489, 021248C, 021248F, 021248W, 0212493, 0212498,

0212499, 021249F, 02124A3, 02124A8, 02124A9, 02124AF, 02124D4, 02124J3,  
02124J8, 02124J9, 02124JF, 02124K3, 02124K8, 02124K9, 02124KF, 02124Z3,  
02124Z8, 02124Z9, 02124ZF, 0213083, 0213088, 0213089, 021308C, 021308F,  
0213093, 0213098, 0213099, 021309F, 02130A3, 02130A8, 02130A9, 02130AF,  
02130J3, 02130J8, 02130J9, 02130JF, 02130K3, 02130K8, 02130K9, 02130KF,  
02130Z3, 02130Z8, 02130Z9, 02130ZF, 0213444, 0213483, 0213488, 0213489,  
021348C, 021348F, 021348W, 0213493, 0213498, 0213499, 021349F, 02134A3,  
02134A8, 02134A9, 02134AF, 02134D4, 02134J3, 02134J8, 02134J9, 02134JF,  
02134K3, 02134K8, 02134K9, 02134KF, 02134Z3, 02134Z8, 02134Z9, 02134ZF

Pulmonary artery catheterization

02HP30Z, 02HP32Z, 02HQ30Z, 02HQ32Z, 02HR30Z, 02HR32Z,  
4A0239Z, 4A023N6, 4A023N8, 4A03353, 4A033B3, 4A1239Z,  
4A13353, 4A133B3

Left ventricular assist device

02HA0QZ

Heart transplantation

02YA0Z0, 02YA0Z1, 02YA0Z2

Gastrointestinal bleeding

K20.81, K20.91, K21.01, K22.11, K22.6, K25.0, K25.2, K25.4, K25.6, K26.0,  
K26.2, K26.4, K26.6, K27.0, K27.2, K27.4, K27.6, K28.0, K28.2, K28.4, K28.6,

K29.01, K29.21, K29.31, K29.41, K29.51, K29.61, K29.71, K29.81, K29.91,  
K31.811, K31.82, K50.011, K50.111, K50.811, K50.911, K51.011, K51.211,  
K51.311, K51.411, K51.511, K51.811, K51.911, K55.21, K57.01, K57.11, K57.13,  
K57.21, K57.31, K57.33, K57.41, K57.51, K57.53, K57.81, K57.91, K57.93, K62.5,  
K91.62, K91.841, K91.871, K92.0, K92.1, K92.2, K94.01, K94.11, K94.21, K94.31

Intracranial bleeding I60.00, I60.01, I60.02, I60.10, I60.11, I60.12, I60.2, I60.30, I60.31, I60.32, I60.4,  
I60.50, I60.51, I60.52, I60.6, I60.7, I60.8, I60.9, I61.0, I61.1, I61.2, I61.3, I61.4,  
I61.5, I61.6, I61.8, I61.9, I62.00, I62.01, I62.02, I62.03, I62.1, I62.9

Hematoma M79.81, L76.02, L76.22, L76.32, L76.34

Procedure-related bleeding I97.410, I97.411, I97.418, I97.42, I97.610, I97.611, I97.618, I97.62, I97.620,  
I97.621, I97.630, I97.631, I97.638, T82.837A, T82.837D, T82.837S, T82.838A,  
T82.838D, T82.838S, K66.1, R58

Pulmonary alveolar bleeding J95.62, J95.830, J95.831, R04.89

Vascular complications I77.0, I77.2, I71.00, I71.010, I71.011, I71.012, I71.019, I71.02, I71.03, I77.70,  
I77.71, I77.72, I77.73, I77.74, I77.75, I77.76, I77.77, I77.79, I77.70, I77.71, I77.72,  
I77.73, I77.74, I77.75, I77.76, I77.77, I77.79, I72.4, T81.7, T81.71, T81.72, T81.710,



T81.711, T81.718, T81.719, T81.710A, T81.710D, T81.710S, T81.711A, T81.711D,  
T81.711S, T81.718A, T81.718D, T81.718S, T81.719A, T81.719D, T81.719S,  
T81.72XA, T81.72XD, T81.72XS, T81.83XA, T82.837A, T82.837D, T82.837S,  
T82.838A, T82.838D, T82.838S, T82.593A, T82.593D, T82.593S

Acute limb ischemia

I743, I745, I7401

ESRD on hemodialysis

Z99.2

Hemodialysis

5A1D70Z, 5A1D80Z, 5A1D90Z

Ischemic stroke

G450, G451, G452, G453, G454, G458, G459, G460, G461, G462, G463, G464,  
G465, G466, G467, G468, H3400, H3401, H3402, H3403, H3410, H3411, H3412,  
H3413, H34211, H34212, H34213, H34219, H34231, H34232, H34233, H34239,  
I6300, I63011, I63012, I63013, I63019, I6302, I63031, I63032, I63033, I63039,  
I6309, I6310, I63111, I63112, I63113, I63119, I6312, I63131, I63132, I63133,  
I63139, I6319, I6320, I63211, I63212, I63213, I63219, I6322, I63231, I63232,  
I63233, I63239, I6329, I6329, I6330, I63311, I63312, I63313, I63319, I63321,  
I63322, I63323, I63329, I63331, I63332, I63333, I63339, I63341, I63342, I63343,  
I63349, I6339, I6340, I63411, I63412, I63413, I63419, I63421, I63422, I63423,

I63429, I63431, I63432, I63433, I63439, I63441, I63442, I63443, I63449, I6350,  
I63511, I63512, I63513, I63519, I63521, I63522, I63523, I63529, I63531, I63532,  
I63533, I63539, I63541, I63542, I63543, I63549, I6359, I636, I638, I6381, I6389,  
I639, I6781, I6782, I97810, I97811, I97820, I97821

Community acquired pneumonia

B96.0, J09.X1, J10.00, J10.01, J10.08, J11.00, J11.08, J12.0, J12.1, J12.2, J12.3,  
J12.81, J12.89, J12.9, J13, J14, J15.3, J15.4, J15.7, J16.8, J17, J18, J18.1, J18.8,  
J18.9

Diarrhea

R19.7, K59.1, K58.0, A07.9, K52.9, T36.95XA, A04.7,  
K52.1, A09, R11.2, K52.29, K91.89

---

**Table S2. Standardized Differences Before and After Propensity Score (PS) Matching.**

| <b>Variable</b>                     | <b>Before PS Matching, %</b> | <b>After PS Matching, %*</b> |
|-------------------------------------|------------------------------|------------------------------|
| <b>Age</b>                          | 12.4                         | 0.4                          |
| <b>Female Sex</b>                   | 24.1                         | 1.0                          |
| <b>STEMI</b>                        | 56.6                         | 5.0                          |
| <b>NSTEMI</b>                       | 9.6                          | 2.6                          |
| <b>Cardiogenic shock due to AMI</b> | 59.7                         | 3.0                          |
| <b>History of cardiac arrest</b>    | 5.2                          | 2.8                          |
| <b>Hypertension</b>                 | 3.4                          | 1.2                          |
| <b>Diabetes Mellitus</b>            | 12.3                         | 0.6                          |
| <b>Coronary artery disease</b>      | 34.7                         | 1.9                          |
| <b>Previous PCI</b>                 | 1.9                          | 1.6                          |
| <b>Previous CABG</b>                | 7.5                          | 0.4                          |
| <b>Chronic kidney disease</b>       | 1.1                          | 1.3                          |
| <b>Heart failure</b>                | 17.9                         | 0.4                          |
| <b>Atrial fibrillation</b>          | 1.2                          | 2.2                          |

|                                               |      |     |
|-----------------------------------------------|------|-----|
| <b>Chronic coagulopathy</b>                   | 0.1  | 0.0 |
| <b>Malignancy</b>                             | 3.6  | 2.7 |
| <b>Chronic Pulmonary Disease</b>              | 10.3 | 2.5 |
| <b>Valvular heart disease</b>                 | 16.3 | 0.5 |
| <b>Human Immunodeficiency Virus<br/>(HIV)</b> | 1.4  | 0.1 |
| <b>Alcohol Use Disorder</b>                   | 3.7  | 3.6 |
| <b>Iron deficiency anemia</b>                 | 2.6  | 2.8 |
| <b>Arthropathy</b>                            | 9.9  | 1.2 |
| <b>Cerebrovascular disease</b>                | 2.4  | 1.8 |
| <b>Dementia</b>                               | 2.4  | 2.6 |
| <b>Depression</b>                             | 12.5 | 2.2 |
| <b>Drug abuse</b>                             | 9.1  | 1.0 |
| <b>Obesity</b>                                | 2.5  | 0.9 |
| <b>Paralysis</b>                              | 1.6  | 0.7 |
| <b>Peripheral Vascular Disease</b>            | 0.9  | 0.2 |

|                                    |      |     |
|------------------------------------|------|-----|
| <b>Hypothyroidism</b>              | 2.3  | 1.7 |
| <b>Other thyroid disorders</b>     | 2.9  | 1.7 |
| <b>Revascularization</b>           | 42.2 | 4.2 |
| <b>Right heart catheterization</b> | 47.3 | 2.5 |
| <b>Income per Zip Code</b>         | 8.3  | 2.9 |
| <b>Hospital Size</b>               | 13.2 | 1.4 |
| <b>Insurance Status</b>            | 12.4 | 0.7 |

---

\*Standardized differences are <10% for all variables after matching, indicating successful PS matching.

**Table S3. Baseline Individual- and Hospital-Level Characteristics for Patients Hospitalized with Cardiogenic Shock Requiring VA-ECMO and Left Ventricular Unloading Device, 2016-2020.**

| <b>Characteristics (%)</b>       | <b>All</b>  | <b>IABP</b> | <b>Impella</b> | <b>P-value</b> |
|----------------------------------|-------------|-------------|----------------|----------------|
| Number of patients, weighted (%) | 5718        | 3098 (19.4) | 2620 (16.4)    | -              |
| Age, median (IQR)                | 59 (49-66)  | 59 (50-68)  | 58 (48-65)     | <0.001         |
| Age group, y                     |             |             |                | 0.004          |
| <50                              | 1448 (25.3) | 734 (23.7)  | 714 (27.3)     |                |
| 50-64                            | 2442 (42.7) | 1289 (41.6) | 1153 (44.0)    |                |
| 65-79                            | 1693 (29.6) | 988 (31.9)  | 705 (26.9)     |                |
| ≥80                              | 136 (2.4)   | 87 (2.8)    | 48 (1.8)       |                |
| Female                           | 1666 (29.1) | 1006 (32.5) | 660 (25.2)     | <0.001         |
| Causes of cardiogenic shock      |             |             |                |                |
| STEMI                            | 2051 (35.9) | 927 (29.9)  | 1123 (42.9)    | <0.001         |
| NSTEMI                           | 879 (15.4)  | 507 (16.4)  | 372 (14.2)     | 0.104          |

|                                  |             |             |             |        |
|----------------------------------|-------------|-------------|-------------|--------|
| Nonischemic                      | 2788 (48.8) | 1664 (53.7) | 1125 (42.9) | <0.001 |
| Previous cardiac arrest          | 215 (3.8)   | 103 (3.3)   | 111 (4.2)   | 0.263  |
| Hypertension                     | 3316 (58.0) | 1863 (60.1) | 1453 (55.5) | 0.010  |
| Diabetes mellitus                | 1895 (33.1) | 1028 (33.2) | 867 (33.1)  | 0.960  |
| Known coronary artery disease    | 3254 (56.9) | 1773 (57.2) | 1481 (56.5) | 0.746  |
| Prior PCI                        | 72 (1.3)    | 39 (1.3)    | 33 (1.3)    | 0.964  |
| Prior CABG                       | 304 (5.3)   | 201 (6.5)   | 103 (3.9)   | 0.001  |
| Iron deficiency anemia           | 235 (4.1)   | 140 (4.5)   | 95 (3.6)    | 0.238  |
| Chronic kidney disease           | 1796 (31.4) | 1059 (34.2) | 737 (28.1)  | <0.001 |
| CHF                              | 3319 (58.0) | 1817 (58.7) | 1501 (57.3) | 0.481  |
| Atrial fibrillation              | 2132 (37.3) | 1266 (40.9) | 867 (33.1)  | <0.001 |
| Coagulopathy                     | 2549 (44.6) | 1420 (45.8) | 1129 (43.1) | 0.178  |
| COPD (chronic pulmonary disease) | 901 (15.8)  | 547 (17.6)  | 354 (13.5)  | 0.002  |

|                                                    |             |             |             |        |
|----------------------------------------------------|-------------|-------------|-------------|--------|
| Peripheral vascular disease                        | 1297 (22.7) | 725 (23.4)  | 571 (21.8)  | 0.340  |
| Valvular heart disease                             | 218 (3.8)   | 166 (5.4)   | 52 (2.0)    | <0.001 |
| Elixhauser comorbidity score $\geq 4$              | 2114 (37.0) | 1237 (39.9) | 877 (33.5)  | 0.002  |
| Procedures/surgeries performed                     |             |             |             |        |
| Revascularization among ischemic cardiogenic shock | 2091 (71.4) | 1040 (72.5) | 1051 (70.3) | 0.344  |
| PCI                                                | 1611 (55.0) | 668 (46.6)  | 943 (63.0)  | <0.001 |
| CABG                                               | 638 (21.8)  | 495 (34.5)  | 143 (9.6)   | <0.001 |
| Right heart catheterization                        | 2349 (41.1) | 1104 (35.6) | 1245 (14.5) | <0.001 |
| LVAD                                               | 452 (7.9)   | 229 (7.4)   | 222 (8.5)   | 0.366  |
| Heart transplantation                              | 370 (6.5)   | 291 (9.4)   | 79 (3.0)    | <0.001 |



|                          |             |             |             |        |
|--------------------------|-------------|-------------|-------------|--------|
| Median household income  |             |             |             | 0.446  |
| 1st quartile             | 1424 (24.9) | 804 (25.9)  | 621 (23.7)  |        |
| 2nd quartile             | 1392 (24.3) | 761 (24.6)  | 631 (24.1)  |        |
| 3rd quartile             | 1457 (25.5) | 755 (24.4)  | 703 (26.8)  |        |
| 4th quartile             | 1445 (25.3) | 778 (25.1)  | 666 (25.4)  |        |
| Primary payer            |             |             |             | <0.001 |
| Medicare                 | 2093 (36.6) | 1259 (40.7) | 834 (31.8)  |        |
| Medicaid                 | 926 (16.2)  | 503 (16.2)  | 423 (16.1)  |        |
| Private including HMO    | 2245 (39.3) | 1132 (36.6) | 1113 (42.5) |        |
| Self-pay/no charge/other | 454 (7.9)   | 203 (6.5)   | 251 (9.6)   |        |
| Hospital bed size        |             |             |             | 0.009  |
| Small                    | 141 (2.5)   | 83 (2.8)    | 58 (2.2)    |        |
| Medium                   | 759 (13.3)  | 349 (11.3)  | 409 (15.6)  |        |

|                                                       |                              |                              |                               |       |
|-------------------------------------------------------|------------------------------|------------------------------|-------------------------------|-------|
| Large                                                 | 4818 (84.2)                  | 2665 (85.9)                  | 2153 (82.2)                   |       |
| Time to VA-ECMO,<br>median (IQR), d                   | 0 (0-1.9)                    | 0.2 (0-3.4)                  | 0 (0-1.0)                     | 0.015 |
| Length of hospital stay,<br>median (IQR), d           | 29 (16-47)                   | 29 (17-46)                   | 27 (14-47)                    | 0.323 |
| Disposition*                                          |                              |                              |                               | 0.005 |
| Home                                                  | 1251 (21.9)                  | 718 (23.2)                   | 533 (20.4)                    |       |
| Facility†                                             | 1518 (26.6)                  | 880 (28.4)                   | 638 (24.5)                    |       |
| Died                                                  | 2935 (51.5)                  | 1498 (48.4)                  | 1437 (55.1)                   |       |
| Cost of index<br>hospitalization, median<br>(IQR), \$ | 170199<br>(98911-<br>283933) | 169158<br>(97903-<br>280557) | 171386<br>(101507-<br>288212) | 0.737 |

VA-ECMO = Veno-arterial extracorporeal membrane oxygenation; IABP = Intra-aortic balloon pump; IQR = Interquartile range;

STEMI = ST-segment elevation myocardial infarction; NSTEMI = Non-ST-elevation myocardial infarction; PCI = Percutaneous coronary intervention; CABG = Coronary artery bypass graft; CHF = Congestive heart failure; LVAD = Left ventricular assist device.

\*Disposition: AMA/unknown not counted due to number of patients <10 for patient confidentiality accordingly to HCUP guideline.

†Facility includes skilled nursing facility, intermediate care facility and inpatient rehabilitation facility.

**Table S4. Comparison of Baseline Individual- and Hospital-Level Characteristics for Patients Hospitalized with Cardiogenic Shock Requiring VA-ECMO With Left Ventricular Unloading Devices Between IABP and Different Platforms of Impella, 2016-2020.**

| <b>Characteristics (%)</b>          | <b>All</b>  | <b>IABP</b> | <b>Impella 2.5/CP</b> | <b>P-value*</b> | <b>Impella<br/>5.0/LD/5.5</b> | <b>P-value†</b> |
|-------------------------------------|-------------|-------------|-----------------------|-----------------|-------------------------------|-----------------|
| Number of patients,<br>weighted (%) | 5718        | 3098 (19.4) | 2181 (13.6)           | -               | 440 (2.7)                     | -               |
| Age, median (IQR)                   | 59 (49-66)  | 59 (50-68)  | 58 (50-66)            | 0.341           | 53 (41-61)                    | <0.001          |
| Age group, y                        |             |             |                       | 0.402           |                               | -               |
| <50                                 | 1448 (25.3) | 734 (23.7)  | 525 (24.1)            |                 | 190 (43.2)                    |                 |
| 50-64                               | 2442 (42.7) | 1289 (41.6) | 961 (44.0)            |                 | 192 (43.7)                    |                 |
| 65-79                               | 1693 (29.6) | 988 (31.9)  | 647 (29.7)            |                 | 58 (13)                       |                 |
| ≥80                                 | 136 (2.4)   | 87 (2.8)    | 48 (2.2)              |                 | 0 (0)                         |                 |
| Female                              | 1666 (29.1) | 1006 (32.5) | 561 (25.7)            | <0.001          | 99 (22.5)                     | 0.004           |

|                               |             |             |             |        |            |        |
|-------------------------------|-------------|-------------|-------------|--------|------------|--------|
| Causes of cardiogenic shock   |             |             |             |        |            |        |
| STEMI                         | 2051 (35.9) | 927 (29.9)  | 979 (44.9)  | <0.001 | 145 (33.0) | 0.371  |
| NSTEMI                        | 879 (15.4)  | 507 (16.4)  | 317 (14.6)  | 0.195  | 55 (12.4)  | 0.115  |
| Nonischemic                   | 2788 (48.8) | 1664 (53.7) | 885 (40.6)  | <0.001 | 240 (54.6) | 0.814  |
| Previous cardiac arrest       | 215 (3.8)   | 103 (3.3)   | 100 (4.6)   | 0.140  | 11 (2.5)   | 0.466  |
| Hypertension                  | 3316 (58.0) | 1863 (60.1) | 1246 (57.1) | 0.114  | 208 (47.3) | <0.001 |
| Diabetes mellitus             | 1895 (33.1) | 1028 (33.2) | 736 (33.7)  | 0.790  | 131 (29.9) | 0.321  |
| Known coronary artery disease | 3254 (56.9) | 1773 (57.2) | 1279 (58.6) | 0.530  | 203 (46.1) | 0.005  |
| Prior PCI                     | 72 (1.3)    | 39 (1.3)    | 29 (1.3)    | 0.928  | -‡         | 0.618  |
| Prior CABG                    | 304 (5.3)   | 201 (6.5)   | 92 (4.2)    | 0.008  | 12 (2.7)   | 0.013  |
| Iron deficiency anemia        | 235 (4.1)   | 140 (4.5)   | 81 (3.7)    | 0.299  | 15 (3.3)   | 0.348  |
| Chronic kidney disease        | 1796 (31.4) | 1059 (34.2) | 590 (27.1)  | <0.001 | 147 (33.4) | 0.831  |
| CHF                           | 3319 (58.0) | 1817 (58.7) | 1258 (57.7) | 0.632  | 244 (55.5) | 0.405  |
| Atrial fibrillation           | 2132 (37.3) | 1266 (40.9) | 688 (31.5)  | <0.001 | 179 (40.7) | 0.965  |

|                                                    |             |             |            |        |            |        |
|----------------------------------------------------|-------------|-------------|------------|--------|------------|--------|
| Coagulopathy                                       | 2549 (44.6) | 1420 (45.8) | 907 (41.6) | 0.035  | 222 (50.5) | 0.253  |
| COPD (chronic pulmonary disease)                   | 901 (15.8)  | 547 (17.6)  | 303 (13.9) | 0.007  | 51 (11.7)  | 0.022  |
| Peripheral vascular disease                        | 1297 (22.7) | 725 (23.4)  | 477 (21.9) | 0.413  | 94 (21.4)  | 0.444  |
| Valvular heart disease                             | 218 (3.8)   | 166 (5.4)   | 41 (1.9)   | <0.001 | 10 (2.3)   | 0.025  |
| Elixhauser comorbidity score $\geq 4$              | 2114 (37.0) | 1237 (39.9) | 725 (33.2) | 0.003  | 152 (34.6) | 0.175  |
| Procedures/surgeries performed                     |             |             |            |        |            |        |
| Revascularization among ischemic cardiogenic shock | 2091 (71.4) | 1040 (72.5) | 942 (72.7) | 0.940  | 109 (54.7) | <0.001 |
| PCI                                                | 1611 (55.0) | 668 (46.6)  | 847 (65.3) | <0.001 | 96 (48.3)  | 0.765  |
| CABG                                               | 638 (21.8)  | 495 (34.5)  | 118 (9.1)  | <0.001 | 25 (12.4)  | <0.001 |

|                             |             |             |             |        |            |        |
|-----------------------------|-------------|-------------|-------------|--------|------------|--------|
| Right heart catheterization | 2349 (41.1) | 1104 (35.6) | 1019 (46.7) | <0.001 | 227 (51.6) | <0.001 |
| LVAD                        | 452 (7.9)   | 229 (7.4)   | -‡          | <0.001 | 218 (49.7) | <0.001 |
| Heart transplantation       | 370 (6.5)   | 291 (9.4)   | -‡          | <0.001 | 77 (17.6)  | <0.001 |
| Median household income     |             |             |             | 0.368  |            | 0.374  |
| 1st quartile                | 1424 (24.9) | 804 (25.9)  | 527 (24.2)  |        | 93 (21.2)  |        |
| 2nd quartile                | 1392 (24.3) | 761 (24.6)  | 506 (23.2)  |        | 124 (28.3) |        |
| 3rd quartile                | 1457 (25.5) | 755 (24.4)  | 600 (27.5)  |        | 102 (23.3) |        |
| 4th quartile                | 1445 (25.3) | 778 (25.1)  | 547 (25.1)  |        | 119 (27.2) |        |
| Primary payer               |             |             |             | <0.001 |            | <0.001 |
| Medicare                    | 2093 (36.6) | 1259 (40.7) | 733 (33.6)  |        | 101 (22.9) |        |
| Medicaid                    | 926 (16.2)  | 503 (16.2)  | 318 (14.6)  |        | 105 (23.9) |        |
| Private including HMO       | 2245 (39.3) | 1132 (36.6) | 911 (41.8)  |        | 202 (46.0) |        |
|                             | 454 (7.9)   | 203 (6.5)   | 219 (10.0)  |        | 32 (7.2)   |        |

|                                          |             |             |             |        |             |        |
|------------------------------------------|-------------|-------------|-------------|--------|-------------|--------|
| Self-pay/no charge/other                 |             |             |             |        |             |        |
| Hospital bed size                        |             |             |             | <0.001 |             | 0.090  |
| Small                                    | 141 (2.5)   | 83 (2.8)    | 51 (2.3)    |        | -‡          |        |
| Medium                                   | 759 (13.3)  | 349 (11.3)  | 382 (17.5)  |        |             |        |
| Large                                    | 4818 (84.2) | 2665 (85.9) | 1748 (80.2) |        |             |        |
| Time to VA-ECMO, median (IQR), d         | 0 (0-1.9)   | 0.2 (0-3.4) | 0 (0-0.9)   | <0.001 | 0.3 (0-2.0) | 0.861  |
| Time to Impella, median (IQR), d         | -           | -           | 0 (0-1.9)   |        | 1.8 (0-7.0) |        |
| Length of hospital stay, median (IQR), d | 29 (16-47)  | 18 (6-35)   | 10 (3-23)   | <0.001 | 45 (24-68)  | <0.001 |
| Disposition‡                             |             |             |             | <0.001 |             | <0.001 |
| Home                                     | 1251 (21.9) | 718 (23.2)  | 353 (16.3)  |        | 180 (40.9)  |        |
| Facility†                                | 1518 (26.6) | 880 (28.4)  | 507 (23.4)  |        | 130 (29.6)  |        |
| Died                                     | 2935 (51.5) | 1498 (48.4) | 1308 (60.3) |        | 129 (29.5)  |        |

|                                                       |                              |                              |                           |        |                            |        |
|-------------------------------------------------------|------------------------------|------------------------------|---------------------------|--------|----------------------------|--------|
| Time to In-Hospital<br>Death, median (IQR), d         | 7.2 (2.5-<br>16.2)           | 8.4 (3.3-<br>17.7)           | 6.0 (2.0-13.1)            | <0.001 | 19.8 (11.8-29.2)           | <0.001 |
| Cost of index<br>hospitalization, median<br>(IQR), \$ | 170199<br>(98911-<br>283933) | 169158<br>(97903-<br>280557) | 149444 (92062-<br>234588) | <0.001 | 397296 (274669-<br>625969) | <0.001 |

IABP = Intra-aortic balloon pump; VA-ECMO = Veno-arterial extracorporeal membrane oxygenation; STEMI = ST-elevation myocardial infarction; NSTEMI = Non-ST-elevation myocardial infarction; PCI = Percutaneous coronary intervention; CABG = Coronary artery bypass graft surgery; CHF = Congestive heart failure; LVAD = Left ventricular assist device; HMO = health maintenance organization; IQR = interquartile range.

\**P*-value for comparison between IABP and Impella 2.5/CP only.

†*P*-value for comparison between Impella and Impella 5.0/LD/5.5 only.

‡LVAD for Impella 2.5/CP, OHT for Impella 2.5/CP, Hospital bed size for Impella 5.0/LD/5.5, and Prior PCI for Impella 5.0/LD/5.5 not counted due to number of patients <10 for patient confidentiality accordingly to HCUP guideline.

‡Disposition: AMA/unknown not counted due to number of patients <10 for patient confidentiality accordingly to HCUP guideline.

†Facility includes skilled nursing facility, intermediate care facility and inpatient rehabilitation facility.



**Table S5. Comparison of In-Hospital Outcomes in Patients on VA-ECMO for Cardiogenic Shock Based on LV-Unloading Strategies.**

| <b>In-Hospital Outcomes</b>    | <b>Event Rate</b> | <b><i>P</i>-value*</b> | <b><i>P</i>-value*</b> |
|--------------------------------|-------------------|------------------------|------------------------|
| <b>In-hospital mortality</b>   |                   | 0.007                  |                        |
| ECMO only                      | 50.4%             | Ref                    | -                      |
| IABP                           | 48.4%             | 0.196                  | Ref                    |
| Impella                        | 54.8%             | 0.014                  | 0.001                  |
| <b>Vascular complications†</b> |                   | 0.973                  |                        |
| ECMO only                      | 7.9%              | Ref                    | -                      |
| IABP                           | 8.0%              | 0.999                  | Ref                    |
| Impella                        | 8.2%              | 0.999                  | 0.999                  |
| <b>Acute limb ischemia</b>     |                   | 0.479                  |                        |
| ECMO only                      | 4.0%              | Ref                    | -                      |
| IABP                           | 3.7%              | 0.999                  | Ref                    |
| Impella                        | 4.6%              | 0.893                  | 0.681                  |
| <b>Bleeding‡</b>               |                   | 0.003                  |                        |

|                                   |       |        |       |
|-----------------------------------|-------|--------|-------|
| ECMO only                         | 34.8% | Ref    | -     |
| IABP                              | 35.4% | 0.999  | Ref   |
| Impella                           | 40.1% | <0.001 | 0.045 |
| <b>AKI requiring hemodialysis</b> |       | <0.001 |       |
| ECMO only                         | 16.5% | Ref    | -     |
| IABP                              | 16.0% | 0.999  | Ref   |
| Impella                           | 21.8% | <0.001 | 0.002 |
| <b>Ischemic stroke</b>            |       | 0.210  |       |
| ECMO only                         | 9.5%  | Ref    | -     |
| IABP                              | 10.0% | 0.999  | Ref   |
| Impella                           | 8.6%  | 0.999  | 0.629 |

IABP = Intra-aortic balloon pump; VA-ECMO = Veno-arterial extracorporeal membrane oxygenation; AKI=acute kidney injury.

\*P-values are corrected based on Bonferroni Correction method for multiple comparison.

†Vascular complications: Composite of arteriovenous fistula, rupture, dissection, other vascular complications following a procedure, and acute limb ischemia.

‡Bleeding: Composite of CNS bleeding, access-related bleeding including hematoma and retroperitoneal bleeding, GI bleeding, and pulmonary alveolar bleeding.

**Table S6. Comparison of In-Hospital Outcomes in Patients on VA-ECMO for Cardiogenic Shock Based on LV-Unloading Strategies Including Different Platform of Impella.**

| <b>In-Hospital Outcomes</b>    | <b>Event Rate</b> | <b><i>P</i>-value*</b> | <b><i>P</i>-value*</b> |
|--------------------------------|-------------------|------------------------|------------------------|
| <b>In-hospital mortality</b>   |                   | 0.007                  |                        |
| ECMO only                      | 50.4%             | Ref                    | -                      |
| IABP                           | 48.4%             | 0.982                  | Ref                    |
| Impella 2.5/CP                 | 60.0%             | <0.001                 | <0.001                 |
| Impella 5.0/LD/5.5             | 29.5%             | <0.001                 | <0.001                 |
| <b>Vascular complications†</b> |                   | 0.973                  |                        |
| ECMO only                      | 7.9%              | Ref                    | -                      |
| IABP                           | 8.0%              | 0.999                  | Ref                    |
| Impella 2.5/CP                 | 8.1%              | 0.999                  | 0.999                  |
| Impella 5.0/LD/5.5             | 8.3%              | 0.999                  | 0.999                  |
| <b>Bleeding‡</b>               |                   | 0.003                  |                        |
| ECMO only                      | 34.8%             | Ref                    | -                      |
| IABP                           | 35.4%             | 0.999                  | Ref                    |

|                                   |       |        |        |
|-----------------------------------|-------|--------|--------|
| Impella 2.5/CP                    | 38.1% | 0.176  | 0.825  |
| Impella 5.0/LD/5.5                | 49.7% | <0.001 | <0.001 |
| <b>AKI requiring hemodialysis</b> |       | <0.001 |        |
| ECMO only                         | 16.5% | Ref    | -      |
| IABP                              | 16.0% | 0.999  | Ref    |
| Impella 2.5/CP                    | 21.9% | <0.001 | 0.003  |
| Impella 5.0/LD/5.5                | 21.0% | 0.649  | 0.476  |
| <b>Ischemic stroke</b>            |       | 0.210  |        |
| ECMO only                         | 9.5%  | Ref    | -      |
| IABP                              | 10.0% | 0.999  | Ref    |
| Impella 2.5/CP                    | 7.3%  | 0.147  | 0.109  |
| Impella 5.0/LD/5.5                | 15.1% | 0.054  | 0.145  |

IABP = Intra-aortic balloon pump; VA-ECMO = Veno-arterial extracorporeal membrane oxygenation; AKI=acute kidney injury.

\*P-values are corrected based on Bonferroni Correction method for multiple comparison.

†Vascular complications: Composite of arteriovenous fistula, rupture, dissection, other vascular complications following a procedure, and acute limb ischemia. ‡Bleeding: Composite of CNS bleeding, access-related bleeding including hematoma and retroperitoneal bleeding, GI bleeding, and pulmonary alveolar bleeding.

**Table S7. Comparison of In-Hospital Bleeding Outcomes in Patients on VA-ECMO for Cardiogenic Shock Based on LV-  
Unloading Strategies.**

| Bleeding                | Event Rate (%) | <i>P</i> -value | <i>P</i> -value | Adjusted OR (95% CI); <i>P</i> -value |                               |
|-------------------------|----------------|-----------------|-----------------|---------------------------------------|-------------------------------|
| CNS Bleeding            |                |                 |                 |                                       |                               |
| ECMO only               | 4.8            | Ref             | -               | Ref                                   | -                             |
| IABP                    | 4.3            | 0.999*          | Ref             | 0.91 (0.61-1.35);<br>P=0.999*         | Ref                           |
| Impella                 | 5.7            | 0.477†          | 0.300‡          | 1.16 (0.83-1.63);<br>P=0.853†         | 1.28 (0.81-2.01);<br>P=0.581‡ |
| Access-Related Bleeding |                |                 |                 |                                       |                               |
| ECMO only               | 18.0           | Ref             | -               | Ref                                   | -                             |
| IABP                    | 20.6           | 0.091*          | Ref             | 1.12 (0.93-1.35);<br>P=0.437*         | Ref                           |
| Impella                 | 22.0           | 0.002†          | 0.999‡          | 1.29 (1.07-1.56);<br>P=0.003†         | 1.15 (0.92-1.45);<br>P=0.398‡ |
| GI Bleeding             |                |                 |                 |                                       |                               |

|                    |      |             |             |                               |                               |
|--------------------|------|-------------|-------------|-------------------------------|-------------------------------|
| ECMO only          | 12.5 | Ref         | -           | Ref                           | -                             |
| IABP               | 12.2 | 0.999*      | Ref         | 0.94 (0.76-1.16);<br>0.999*   | Ref                           |
| Impella            | 16.8 | <0.001<br>† | <0.001<br>‡ | 1.29 (1.05-1.59);<br>0.008†   | 1.38 (1.07-1.78);<br>0.009‡   |
| Pulmonary Bleeding |      |             |             |                               |                               |
| ECMO only          | 5.0  | Ref         | -           | Ref                           | -                             |
| IABP               | 3.9  | 0.257*      | Ref         | 0.81 (0.56-1.16);<br>P=0.478* | Ref                           |
| Impella            | 3.1  | 0.021†      | 0.644‡      | 0.64 (0.41-0.99);<br>P=0.048† | 0.80 (0.49-1.29);<br>P=0.771‡ |

IABP = Intra-aortic balloon pump; VA-ECMO = Veno-arterial extracorporeal membrane oxygenation; CI = Confidence interval.

\*P-value: comparison between IABP and ECMO only

†P-value: comparison between Impella and ECMO only

‡ P-value: comparison between Impella and IABP

\*†‡P-values are corrected based on Bonferroni Correction method for multiple comparison.

**Table S8. Association of LV Unloading Strategy with In-Hospital Outcomes in Patients on VA-ECMO for Cardiogenic Shock.**

| In-Hospital Outcomes             | Univariate Analysis |                  | Multivariable Analysis |                  |
|----------------------------------|---------------------|------------------|------------------------|------------------|
|                                  | Odds Ratio (95% CI) | <i>P</i> -value* | Odds Ratio (95% CI)    | <i>P</i> -value* |
| In-hospital mortality            |                     |                  |                        |                  |
| IABP vs. ECMO only               | 0.92 (0.78-1.09)    | 0.999            | 0.83 (0.69-1.00)       | 0.051            |
| Impella 2.5/CP vs. ECMO only     | 1.47 (1.19-1.81)    | <0.0001          | 1.34 (1.09-1.65)       | 0.001            |
| Impella 2.5/CP vs. IABP          | 1.60 (1.27-2.02)    | <0.0001          | 1.61 (1.28-2.03)       | <0.001           |
| Impella 5.0/LD/5.5 vs. ECMO only | 0.41 (0.26-0.64)    | <0.0001          | 0.40 (0.26-0.64)       | <0.001           |
| Impella 5.0/LD/5.5 vs. IABP      | 0.45 (0.29-0.69)    | <0.0001          | 0.49 (0.31-0.76)       | <0.001           |
| Vascular complication            |                     |                  |                        |                  |
| IABP vs. ECMO only               | 1.01 (0.71-1.43)    | 0.999            | 1.03 (0.72-1.48)       | 0.999            |
| Impella 2.5/CP vs. ECMO only     | 1.03 (0.73-1.44)    | 0.999            | 1.07 (0.76-1.50)       | 0.999            |
| Impella 2.5/CP vs. IABP          | 1.02 (0.67-1.54)    | 0.999            | 1.04 (0.68-1.57)       | 0.999            |
| Impella 5.0/LD/5.5 vs. ECMO only | 1.05 (0.56-1.98)    | 0.999            | 1.05 (0.55-2.03)       | 0.999            |
| Impella 5.0/LD/5.5 vs. IABP      | 1.04 (0.52-2.07)    | 0.999            | 1.02 (0.50-2.08)       | 0.999            |
| Bleeding†                        |                     |                  |                        |                  |

|                                  |                  |        |                  |        |
|----------------------------------|------------------|--------|------------------|--------|
| IABP vs. ECMO only               | 1.03 (0.86-1.23) | 0.999  | 0.99 (0.83-1.18) | 0.999  |
| Impella 2.5/CP vs. ECMO only     | 1.16 (0.96-1.38) | 0.211  | 1.12 (0.93-1.34) | 0.697  |
| Impella 2.5/CP vs. IABP          | 1.13 (0.90-1.41) | 0.999  | 1.13 (0.90-1.43) | 0.946  |
| Impella 5.0/LD/5.5 vs. ECMO only | 1.85 (1.33-2.57) | <0.001 | 1.76 (1.27-2.46) | <0.001 |
| Impella 5.0/LD/5.5 vs. IABP      | 1.80 (1.24-2.62) | <0.001 | 1.79 (1.22-2.62) | <0.001 |
| AKI requiring hemodialysis       |                  |        |                  |        |
| IABP vs. ECMO only               | 0.96 (0.76-1.22) | 0.999  | 0.95 (0.75-1.21) | 0.999  |
| Impella 2.5/CP vs. ECMO only     | 1.42 (1.11-1.82) | <0.001 | 1.50 (1.16-1.93) | <0.001 |
| Impella 2.5/CP vs. IABP          | 1.48 (1.10-1.99) | 0.003  | 1.57 (1.15-2.16) | <0.001 |
| Impella 5.0/LD/5.5 vs. ECMO only | 1.34 (0.80-2.26) | 0.808  | 1.10 (0.67-1.81) | 0.999  |
| Impella 5.0/LD/5.5 vs. IABP      | 1.40 (0.82-2.38) | 0.598  | 1.16 (0.68-1.97) | 0.999  |
| Ischemic stroke                  |                  |        |                  |        |
| IABP vs. ECMO only               | 1.06 (0.81-1.39) | 0.999  | 0.99 (0.75-1.31) | 0.999  |
| Impella 2.5/CP vs. ECMO only     | 0.75 (0.52-1.07) | 0.188  | 0.67 (0.47-0.97) | 0.023  |
| Impella 2.5/CP vs. IABP          | 0.71 (0.47-1.06) | 0.135  | 0.68 (0.46-1.01) | 0.063  |
| Impella 5.0/LD/5.5 vs. ECMO only | 1.69 (0.97-2.94) | 0.073  | 1.55 (0.87-2.76) | 0.267  |



|                             |                  |       |                  |       |
|-----------------------------|------------------|-------|------------------|-------|
| Impella 5.0/LD/5.5 vs. IABP | 1.60 (0.90-2.83) | 0.181 | 1.57 (0.87-2.82) | 0.265 |
|-----------------------------|------------------|-------|------------------|-------|

AKI=acute kidney injury; CI = Confidence interval; IABP = Intra-aortic balloon pump; VA-ECMO = Veno-arterial extracorporeal membrane oxygenation.

\*P-values are corrected based on Bonferroni Correction method for multiple comparison.

**Table S9. Association of Impella vs. IABP with In-Hospital Mortality in Patients on VA-ECMO for Cardiogenic Shock.**

| <b>Subgroup</b>                      | <b>Odds Ratio (95% CI)</b> | <b><i>P</i>-value</b> | <b><i>P</i> for interaction</b> |
|--------------------------------------|----------------------------|-----------------------|---------------------------------|
| <b>Etiology of Cardiogenic Shock</b> |                            |                       | 0.811                           |
| <b>Acute myocardial infarction</b>   | 1.32 (1.05-1.68)           | 0.020                 |                                 |
| <b>Nonischemic</b>                   | 1.43 (1.14-1.79)           | 0.002                 |                                 |

IABP = Intra-aortic balloon pump; VA-ECMO = Veno-arterial extracorporeal membrane oxygenation; CI = Confidence interval.

**Table S10. Association Between Left Ventricular Unloading Device and Early Mortality Based on Regression and Propensity Score Analyses.**

| Left ventricular unloading device | Model 1*                 |                     | Model 2†                 |                     | Model 3‡                 |                     | Model 4§                 |                     |
|-----------------------------------|--------------------------|---------------------|--------------------------|---------------------|--------------------------|---------------------|--------------------------|---------------------|
|                                   | Hazard Ratio<br>(95% CI) | <i>P</i> -<br>value |
| <b>Impella vs. IABP</b>           | 1.28 (1.14-1.43)         | <0.001              | 1.28 (1.15-1.44)         | <0.001              | 1.31 (1.14-1.51)         | <0.001              | 1.25 (1.17-1.32)         | <0.001              |

IABP = Intra-aortic balloon pump; HR = Hazard ratio; CI = Confidence interval.

\*Model 1: Cox proportional multivariable regression.

†Model 2: Propensity score (PS) included as a covariate in the multivariable logistic regression model.

‡Model 3: Analysis based on the PS matching.

§Model 4: Inverse probability of treatment weights (IPTW) analysis based on the PS after trimming by excluding those lying outside of the 1st to 99th percentiles of the PS distribution. Adjusted odds ratio (95% CI) without trimming: 1.25 (1.18-1.31),  $p < 0.001$ .

**Table S11. Comparison of falsification endpoints among propensity-matched patients with cardiogenic shock on VA-ECMO receiving Impella vs. IABP for left ventricular unloading.**

| <b>Falsification endpoint, n (%)</b> | <b>Impella, n=1149</b> | <b>IABP, n=1149</b> | <b>Odds Ratio (95% CI)</b> | <b>P-value</b> |
|--------------------------------------|------------------------|---------------------|----------------------------|----------------|
| <b>Pneumonia</b>                     | 175 (15.2)             | 193 (16.5)          | 0.90 (0.72-1.14)           | 0.383          |
| <b>Composite endpoint</b>            | 129 (11.2)             | 118 (10.3)          | 1.11 (0.85-1.46)           | 0.445          |
| <b>Diarrhea</b>                      | 39 (3.4)               | 35 (3.1)            | 1.13 (0.70-1.83)           | 0.623          |
| <b>Cellulitis</b>                    | 18 (1.6)               | 16 (1.4)            | 1.13 (0.57-2.21)           | 0.732          |
| <b>Intestinal obstruction</b>        | 80 (7.0)               | 76 (6.6)            | 1.06 (0.76-1.47)           | 0.737          |

VA-ECMO = Veno-arterial extracorporeal membrane oxygenation; IABP = Intra-aortic balloon pump; CI = Confidence interval.

**Table S12. Sensitivity Analyses for Association of LV Unloading Strategy with In-Hospital Mortality in Patients on VA-ECMO for Cardiogenic Shock\*.**

| In-Hospital Outcomes  | Univariate Analysis |                  | Multivariable Analysis |                  |
|-----------------------|---------------------|------------------|------------------------|------------------|
|                       | Odds Ratio (95% CI) | <i>P</i> -value† | Odds Ratio (95% CI)    | <i>P</i> -value† |
| In-hospital Mortality |                     |                  |                        |                  |
| IABP vs. ECMO only    | 0.58 (0.36-0.93)    | 0.016            | 0.54 (0.32-0.89)       | 0.010            |
| Impella vs. ECMO only | 1.28 (0.79-2.08)    | 0.666            | 1.23 (0.75-2.01)       | 0.980            |
| Impella vs. IABP      | 2.21 (1.19-4.12)    | 0.007            | 2.29 (1.21-4.31)       | 0.005            |

VA-ECMO = Veno-arterial extracorporeal membrane oxygenation; IABP = Intra-aortic balloon pump; CI = Confidence interval.

\*Among patients on ECMO only or those who had LV unloading started on days subsequent to VA-ECMO cannulation day.

†All *P*-values are corrected for multiple comparisons using Bonferroni method.

**Figure S1. Primary Causes of 30-Day Readmission Following Hospitalization with Cardiogenic Shock Requiring VA-ECMO.**

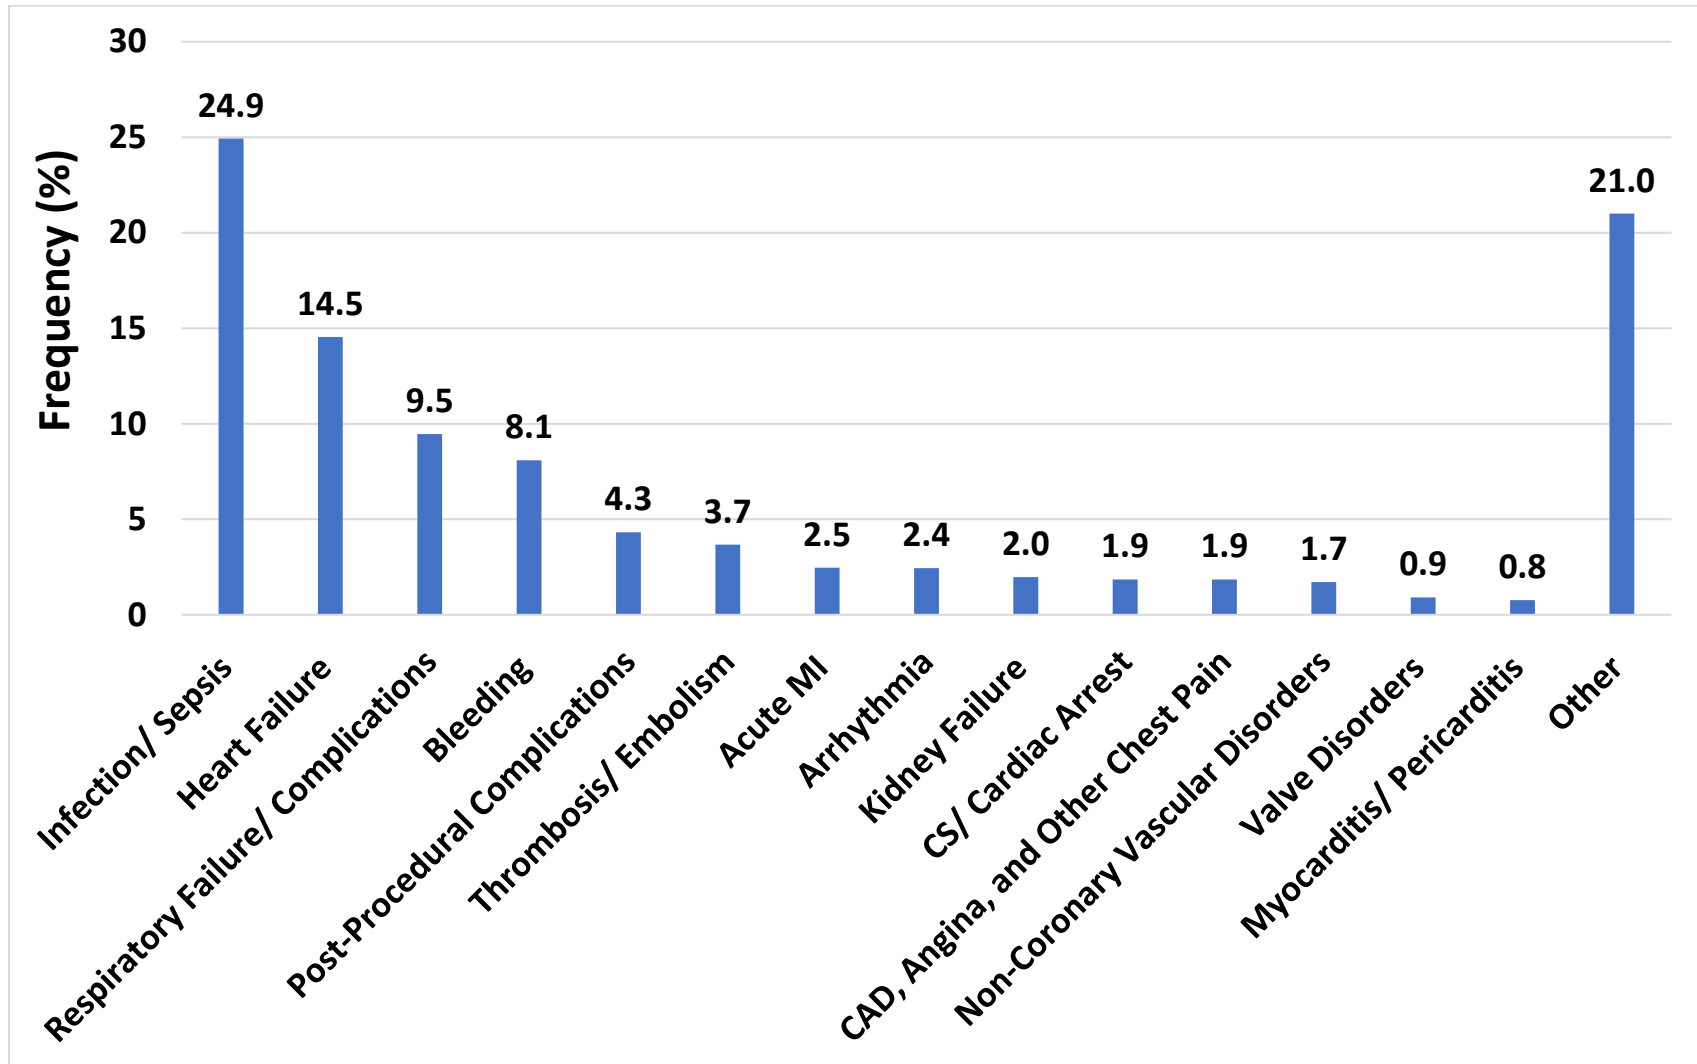

**Figure S2. Primary Procedures Performed during 30-Day Readmission Following Hospitalization with Cardiogenic Shock Requiring VA-ECMO.**

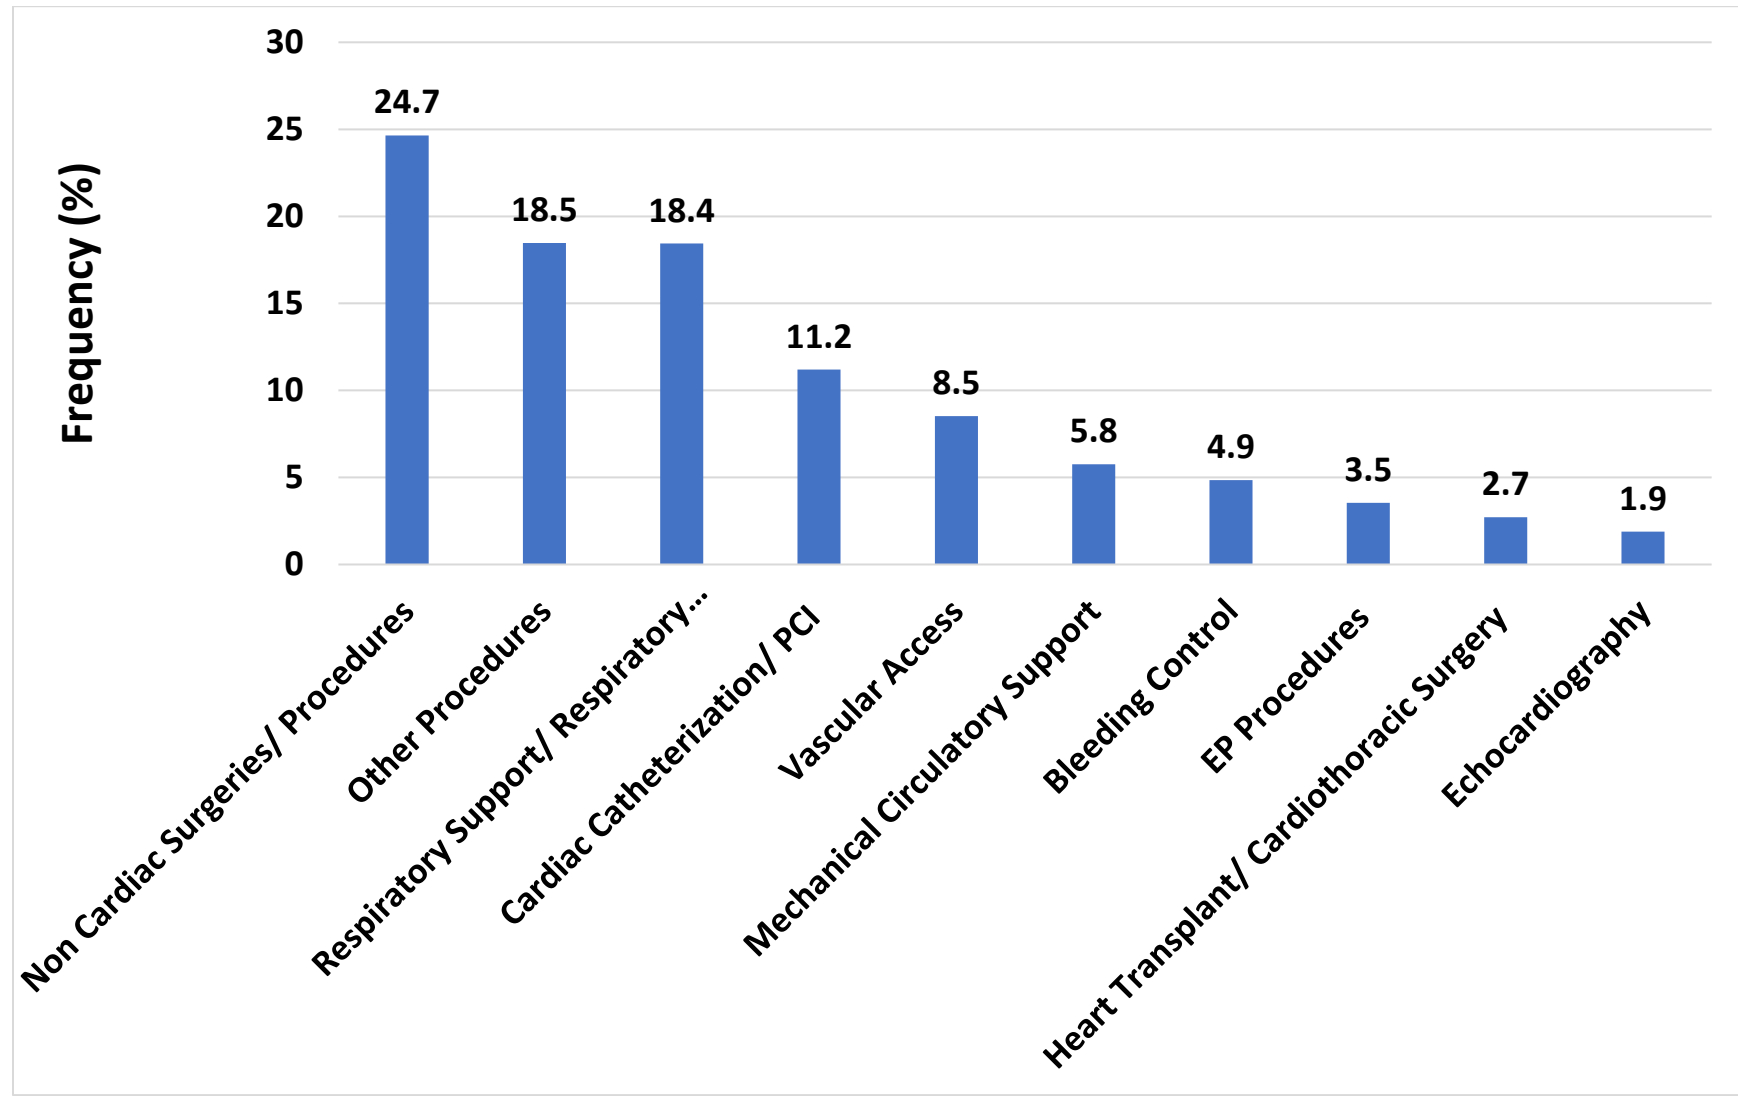

Supplement: JAH3-13-e032607-s001.pdf [file JAH3-13-e032607-s001.pdf]
